# Supplementary material for: Inhibition of DEPDC1A, a Bad Prognostic Marker in Multiple Myeloma, Delays Growth and Induces Mature Plasma Cell Markers in Malignant Plasma Cells
Source: PubMed Central journal article supplement (PMC3640027; doi:10.1371/journal.pone.0062752), 2013-04-30
Supplement: pone.0062752.s007.pdf [file pone.0062752.s007.pdf]

| <b>Univariate Cox analysis - Overall survival</b> |     |          |
|---------------------------------------------------|-----|----------|
| <b>LR-TT2</b>                                     |     |          |
|                                                   | HR  | <i>P</i> |
| DEPDC1A                                           | 2.3 | 2.10E-05 |
| GPI                                               | 1.8 | 2.20E-04 |
| PR stratification                                 | 2.6 | 1.70E-04 |

| <b>Multivariate Cox analysis - Overall survival</b> |     |          |
|-----------------------------------------------------|-----|----------|
| <b>LR-TT2</b>                                       |     |          |
|                                                     | HR  | <i>P</i> |
| DEPDC1A                                             | 1.8 | 1.40E-02 |
| GPI                                                 | 1.4 | NS       |
| DEPDC1A                                             | 2   | 1.60E-03 |
| PR stratification                                   | 1.8 | 0.03     |

| <b>Multivariate Cox analysis - Overall survival</b> |     |          |
|-----------------------------------------------------|-----|----------|
| <b>LR-TT2</b>                                       |     |          |
|                                                     | HR  | <i>P</i> |
| DEPDC1A                                             | 1.7 | 0.028    |
| GPI                                                 | 1.2 | NS       |
| PR stratification                                   | 1.6 | NS       |

Table S2. Cox univariate and multivariate analysis of overall survival in UAMS-TT2 patients' cohorts.
